# Supplementary material for: Honeycomb nanoscale-porous material constructed from copper complexes and mixed-addenda Lindqvist-type polyoxoanions
Source: Royal Society of Chemistry journal article supplement (doi:10.1039/c004543h), 2010-01-01
Supplement: c004543h.pdf [file c004543h.pdf]

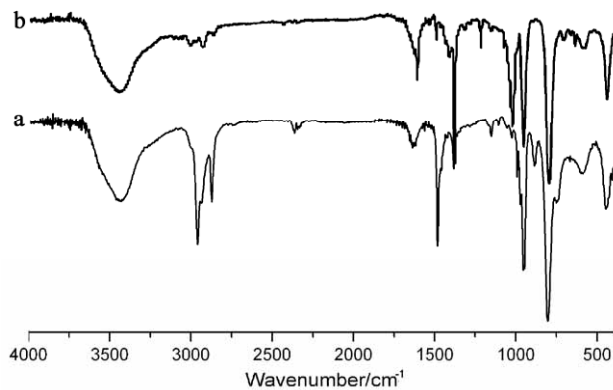

Fig. S1 FT-IR spectra of (a) [(n-C<sub>4</sub>H<sub>9</sub>)<sub>4</sub>N]<sub>4</sub>[V<sub>2</sub>W<sub>4</sub>O<sub>19</sub>] and (b) **1**.

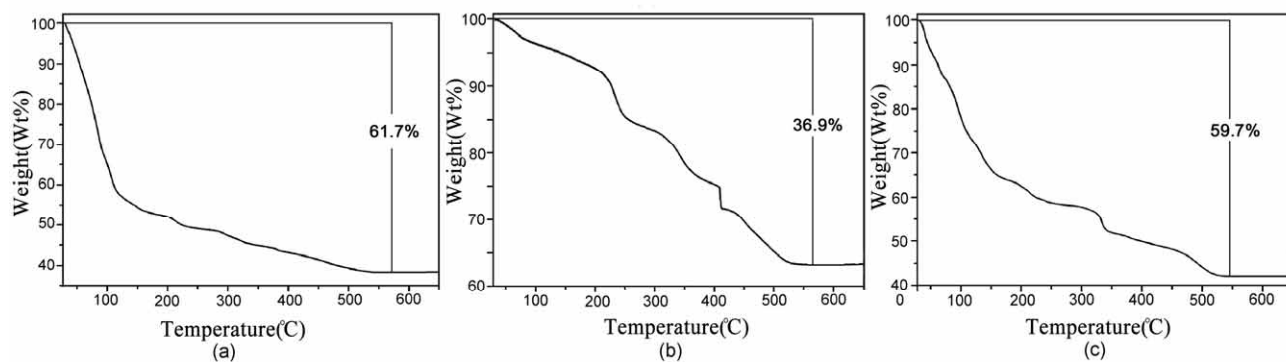

Fig. S2 TGA curves of (a) as-synthesized sample, **1**, (b) guest DMSO-free phase, **1a** (c) re-adsorption sample, **1b**. The number of guest DMSO molecules per unit cell in the channels is calculated by deduction of the coordinated DMSO molecules and by ligands.
